# Supplementary material for: Localized high-concentration electrolyte enabled by a novel ester diluent for lithium metal batteries
Source: Royal Society of Chemistry journal article supplement (doi:10.1039/d2cc05847b), 2022-12-12
Supplement: d2cc05847b1.pdf [file d2cc05847b1.pdf]

## Supporting Information

### **Localized high-concentration electrolyte enabled by a novel ester diluent for lithium metal batteries**

Meng Zhu,<sup>a</sup> Xiaojuan Jiao,<sup>a</sup> Wenwei Wang,<sup>a</sup> Haiwei Chen<sup>\*ab</sup> and Fengjiao Li<sup>\*a</sup>

<sup>a</sup> Shenzhen Automotive Research Institute, Beijing Institute of Technology, Shenzhen 518118, China.

<sup>b</sup> National Engineering Laboratory for Electric Vehicles, Beijing Institute of Technology, Beijing 100081, China.

\*Corresponding author.

E-mail: chenhaiwei@szari.ac.cn; lifengjiao@szari.ac.cn

## **Experimental section**

### ***Materials Preparation***

Lithium bis(fluorosulfonyl)imide (LiFSI, 99.9%) and dimethyl carbonate (DMC, 99.9%) were purchased from Huizhou City Avenue New Materials Technology Co., Ltd. The diluent, 2,2,2-trifluoroethyl trifluoromethanesulfonate (TFEOTf, 99%), was bought from Sinopharm Chemical Reagent Co., Ltd. All of the materials mentioned above were employed without further purification. Electrolytes were prepared in glovebox ( $\text{H}_2\text{O} < 0.01 \text{ ppm}$ ,  $\text{O}_2 < 0.01 \text{ ppm}$ ) filled with Ar. The cathode was prepared by blending  $\text{LiNi}_{0.6}\text{Mn}_{0.2}\text{Co}_{0.2}\text{O}_2$ , Super-P and polyvinylidene fluoride in a mass ratio of 93:5:2 with appropriate amount of N-methyl pyrrolidinone (all from Canrd) as a dispersant, immediately after which the slurry was coated on aluminum foil and then dried in a drying oven. Finally, the prepared electrode was cut into 12 mm diameter disks with an areal density of about  $10.8 \text{ mg cm}^{-2}$ .

### ***Materials Characterizations***

Deposited Li and SEI films, rinsed by DMC for at least 3 times and followed by vacuum drying, were measured on Apreo S (Thermo Scientific) at 2.0 kV to obtain SEM images. Raman spectra were collected by inVia Qontor (Renishaw) using 785 nm laser. XPS for cycled Li anode was tested by K-Alpha (Thermo Scientific). The viscosity and density for laboratory-made electrolytes were measured by Micro Viscometer EDXLovis 2000 M (Anton Paar) equipped with a densitometer. Contact angle tests were carried out on PP separator (Celgard 2400) with different electrolytes through OCA20 (Dataphysics) at 25 °C and the images were analyzed by software Image J.

## ***Electrochemical Measurements***

CR2025 coin cells were assembled in a glove box and tested on CT-4008Tn (Neware) for further examination on the electrochemical performances. For Li||Li symmetric cells, EIS was measured on autolab PGSTAT302N (Metrohm) with frequency ranging from  $10^6$  Hz to 0.1 Hz, and the applied voltage stayed 5 mV. LSV was conducted on the same instrument as EIS, ranging from 3 V to 6 V, with aluminum foil as positive electrode and Li chip as negative electrode, the scanning rate of which was  $1 \text{ mV s}^{-1}$ . 80  $\mu\text{l}$  electrolyte was added into each CR2025 coin cell if no detailed explanation was mentioned. 1 C is equal to  $180 \text{ mAh g}^{-1}$ . Li||Cu and Li||Li cells were assembled with regular stainless steel positive electrode shells, while other cells charged over 4 V were assembled with Al-clad ones (Canrd) to avoid the corrosion from electrolyte. For CE tests, Li||Cu cells were adopted following the procedures: (1) Depositing 5  $\text{mAh cm}^{-2}$  of Li onto Cu foil and stripping all Li to 1 V to exclude the uncertain factors from Cu substrate; (2) Depositing 5  $\text{mAh cm}^{-2}$  of Li onto Cu foil as Li reservoir, based on which cycling in the galvanostatic mode with  $1 \text{ mAh cm}^{-2}$ ; (3) After cycling, then stripping all Li to 1 V. All the current density concerned is  $0.5 \text{ mA cm}^{-2}$ . The CE was calculated by formula as followed:

$$CE_{avg} = \frac{nQ_C + Q_S}{nQ_C + Q_T}$$

where  $Q_T$  is the charge deposited for the second time,  $n$  represents the cycling numbers and  $Q_C$  refers to charge of each cycle in procedure (2),  $Q_S$  is the final stripping charge in procedure (3).

## Supplementary Figures

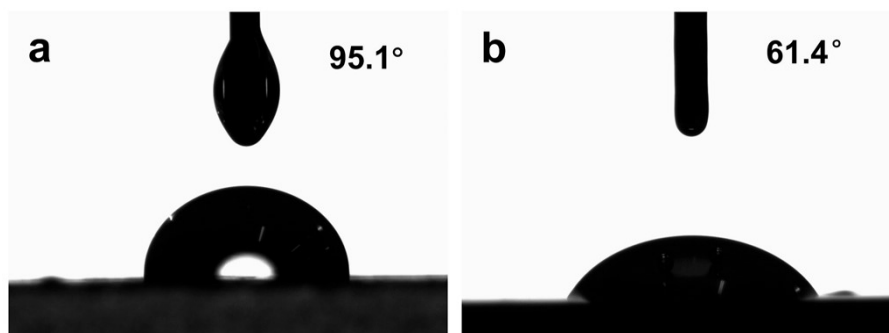

**Fig. S1.** Contact angle tests of (a) HCE of LiFSI-1.2DMC and (b) LHCE of LiFSI-1.2DMC-0.75TFEOTf on the separator celgard 2400.

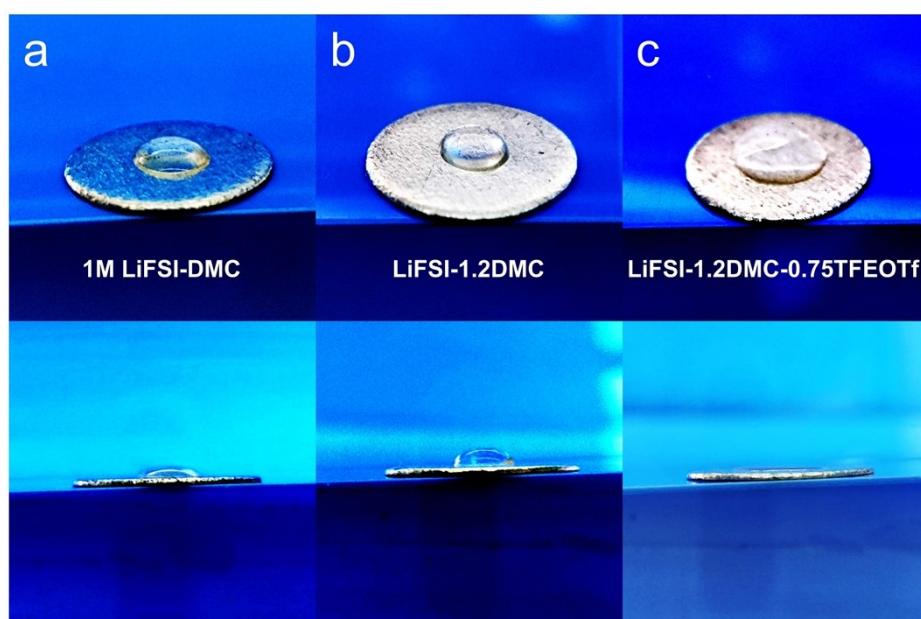

**Fig. S2.** Optical photos of 20  $\mu\text{l}$  (a) dilute electrolyte 1M LiFSI-DMC, (b) HCE of LiFSI-1.2DMC and (c) LHCE of LiFSI-1.2DMC-0.75TFEOTf on the surface of Li chip.

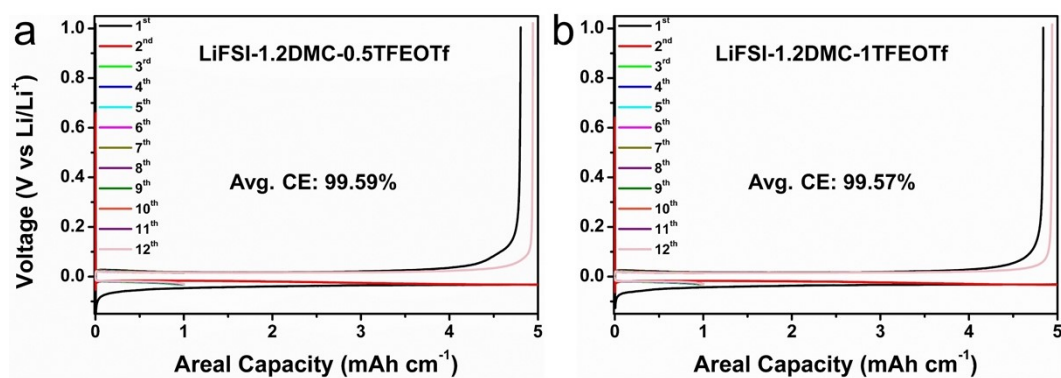

**Fig. S3.** Coulombic efficiency determined by Li||Cu half cells with LHCE of (a) LiFSI-1.2DMC-0.5TFEOTf and (b) LiFSI-1.2DMC-1TFEOTf.

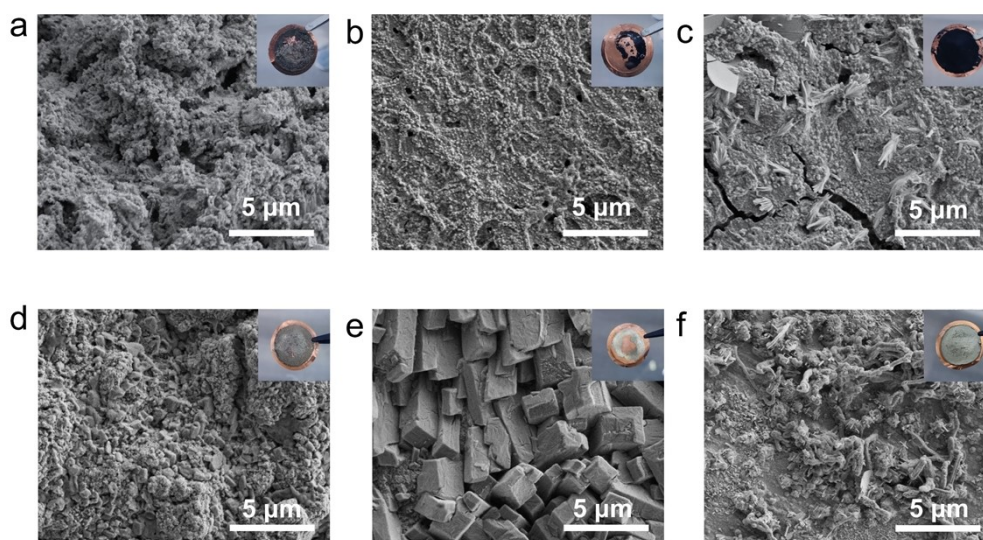

**Fig. S4.** SEM images for SEI on Cu substrate after cycling for 10 cycles and top view of Li deposition topography with (a)(d) dilute electrolyte 1M LiFSI-DMC, (b)(e) HCE of LiFSI-1.2DMC and (c)(f) LHCE of LiFSI-1.2DMC-0.75TFEOTf. Insets are optical photos of disassembled Cu electrodes.

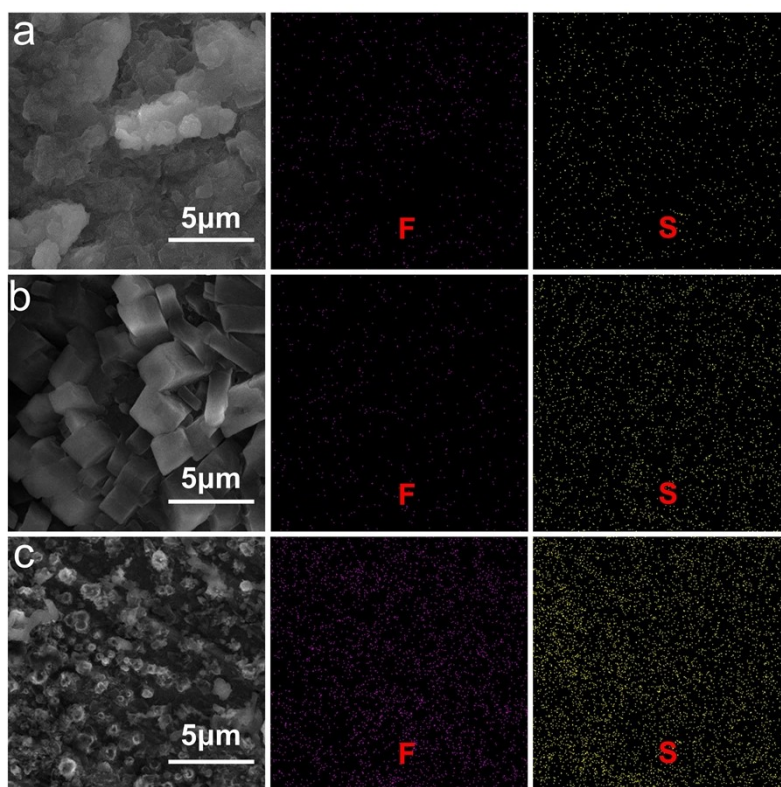

**Fig. S5.** EDX elemental mappings of deposited Li in electrolyte (a) 1M LiFSI-DMC, (b) LiFSI-1.2DMC and (c) LiFSI-1.2DMC-0.75TFEOTf.

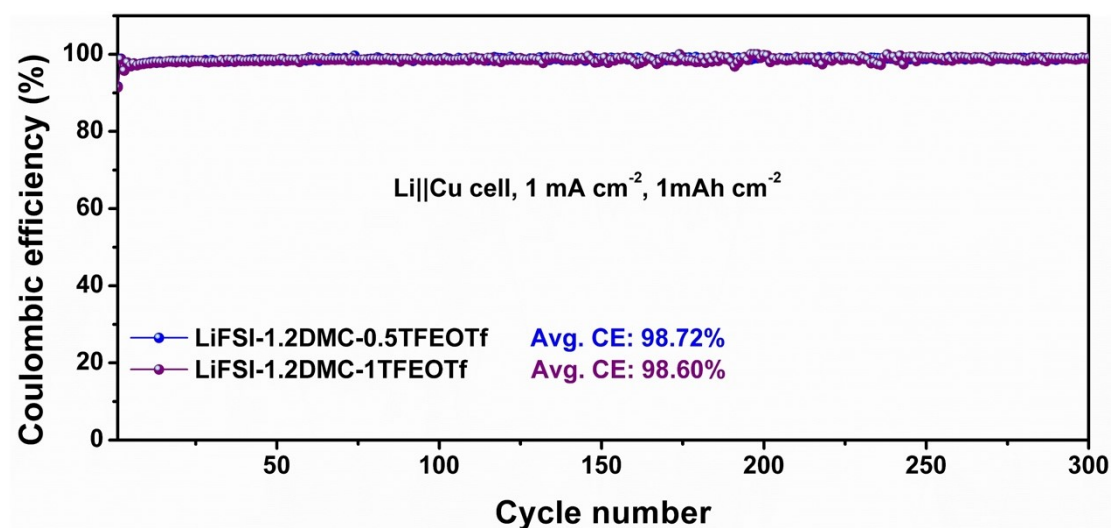

**Fig. S6.** CE of Li||Cu half cells cycling in LiFSI-1.2DMC-0.5TFEOTf and LiFSI-1.2DMC-1TFEOTf at 1 mA cm<sup>-2</sup> with areal capacity of 1 mAh cm<sup>-2</sup>.

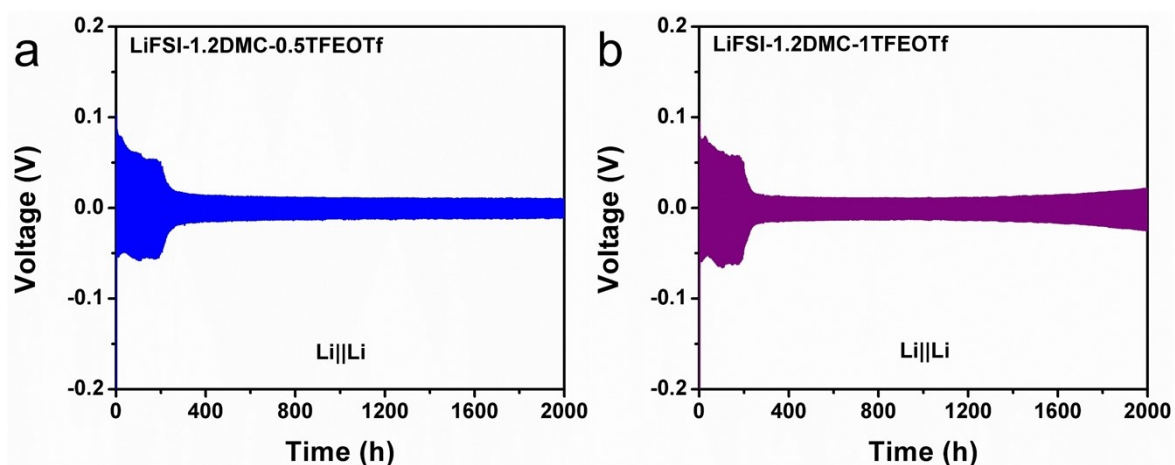

**Fig. S7.** The voltage curves of (a) LiFSI-1.2DMC-0.5TFEOTf and (b) LiFSI-1.2DMC-1TFEOTf by Li||Li symmetric cells at a current density of  $1 \text{ mA cm}^{-2}$  with capacity of  $1 \text{ mAh cm}^{-2}$ .

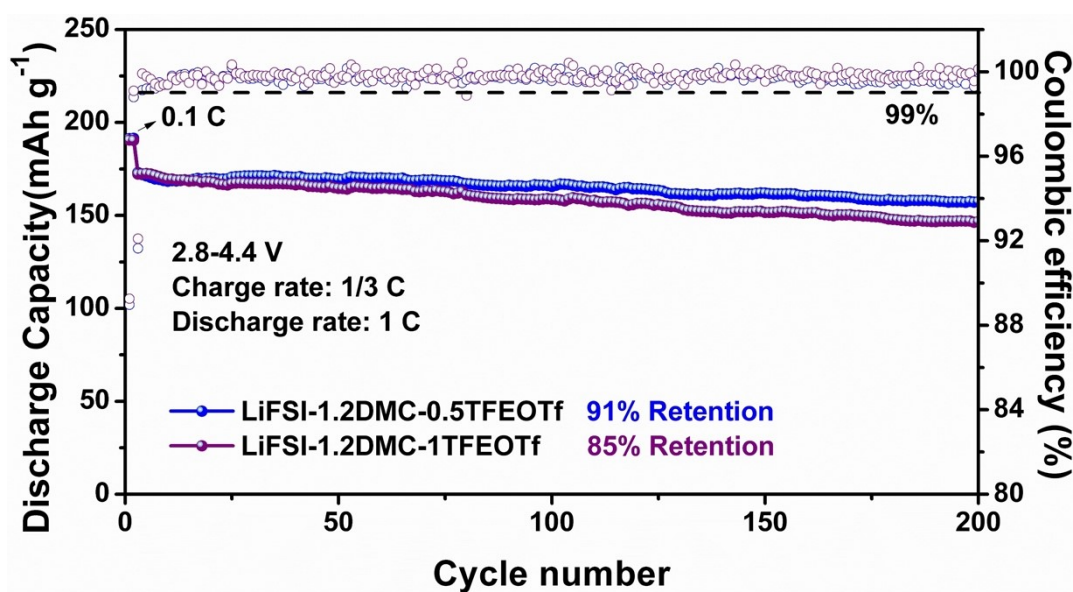

**Fig. S8.** Cycling stability and CEs of Li||NMC622 cells with LHCEs after two formation cycles at  $0.1 \text{ C}$  ( $1 \text{ C}=180 \text{ mAh g}^{-1}$ ).

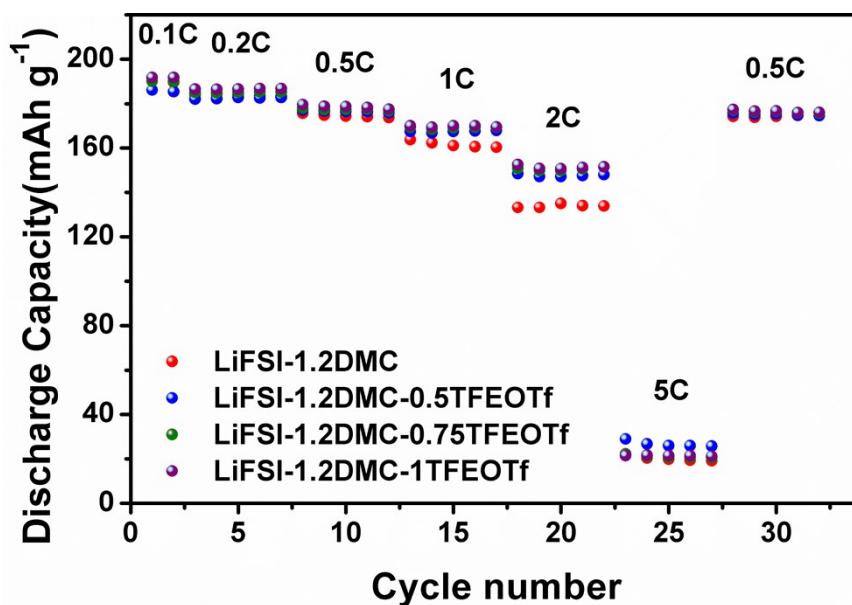

Fig. S9. Rate capability of HCE and LHCEs.

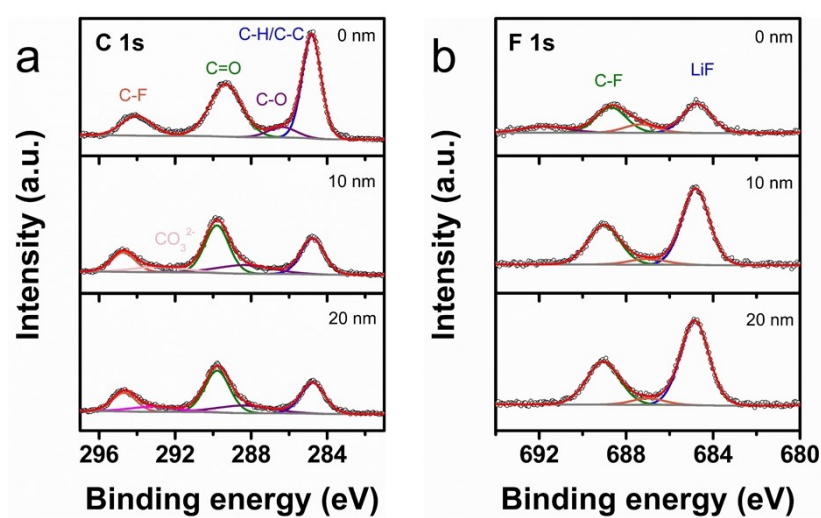

Fig. S10. Depth profiling C 1s (a) and F 1s (b) XPS spectra for SEI on Li surface after 100 cycles in HCE of LiFSI-1.2DMC.



## Supplementary Tables

**Table S1.** Basic physical parameters of different electrolytes.

| Electrolyte             | Molar ratio | Mass Ratio     | Density g/cm <sup>3</sup> | Molarity mol/L | Molality mol/kg | Viscosity (25°C) mPa s |
|-------------------------|-------------|----------------|---------------------------|----------------|-----------------|------------------------|
| 1M LiFSI-DMC            | 1:11.8      | 1.87:10.69     | 1.17                      | 0.93           | 0.94            | 1.80                   |
| LiFSI-1.2DMC            | 1:1.2       | 1.87:1.08      | 1.55                      | 5.25           | 3.39            | 220.90                 |
| LiFSI-1.2DMC-0.5TFEOTf  | 1:1.2:0.5   | 1.87:1.08:1.16 | 1.57                      | 3.82           | 2.43            | 52.37                  |
| LiFSI-1.2DMC-0.75TFEOTf | 1:1.2:0.75  | 1.87:1.08:1.74 | 1.58                      | 3.37           | 2.13            | 33.41                  |
| LiFSI-1.2DMC-1TFEOTf    | 1:1.2:1     | 1.87:1.08:2.32 | 1.58                      | 3.00           | 1.90            | 23.61                  |

**Table S2.** Excess Li calculation under different conditions (Assume Li could be consumed completely before capacity fading happens in Li||NMC cells).

| CE of Li cycling % | Cycling numbers with 90% | Requirements of excess Li   |
|--------------------|--------------------------|-----------------------------|
|                    | capacity retention       | based on cathode capacity % |
| 99.6               | 500                      | 190                         |
|                    | 1000                     | 390                         |
| 99.4               | 500                      | 290                         |
|                    | 1000                     | 590                         |
| 99.2               | 500                      | 390                         |
|                    | 1000                     | 790                         |
| 99.0               | 500                      | 490                         |
|                    | 1000                     | 990                         |

**Table S3.** Qualitative analysis of elements on deposited Li surface in LiFSI-1.2DMC-0.75TFEOTf through EDX elemental mapping.

| <b>Element</b> | <b>Weight %</b> | <b>Atom %</b> |
|----------------|-----------------|---------------|
| C              | 5.65            | 7.69          |
| N              | 9.64            | 11.24         |
| O              | 55.22           | 56.38         |
| F              | 27.62           | 23.74         |
| S              | 1.87            | 0.95          |
| Total          | 100.00          | 100.00        |
